# Supplementary material for: 2,4-Dichlorophenoxyacetic acid functionalized gold nanoparticles: synthesis, characterization and biological effects
Source: Royal Society of Chemistry journal article supplement (doi:10.1039/c4tb00400k), 2014-01-01
Supplement: c4tb00400k1.pdf [file c4tb00400k1.pdf]

Electronic Supplementary Material (ESI) for Journal of Materials Chemistry B  
This journal is © The Royal Society of Chemistry 2014

## Supporting Information for

### **“2,4-dichlorophenoxyacetic acid functionalized gold nanoparticles: synthesis, characterization and biological effects”**

Jin-Liang Jia,<sup>a,b</sup> Li Zhu<sup>b</sup>, Xiao-Yong Jin<sup>a</sup>, Jie Wang<sup>a</sup>, Wei Zhang<sup>a</sup>, Han-Xiang Wu<sup>a</sup> and  
Han-Hong Xu<sup>\*a</sup>

<sup>a</sup> State Key Laboratory for Conservation and Utilization of Subtropical Agro-bioresources, South China Agricultural University, Guangzhou, Guangdong 510642, China

<sup>b</sup> Institute of Biomaterials, College of Sciences, South China Agricultural University, Guangzhou, Guangdong 510642, China

E-mail: [hhxu@scau.edu.cn](mailto:hhxu@scau.edu.cn)

Tel: 86-20- 85285127

Fax: 86-20-38604926

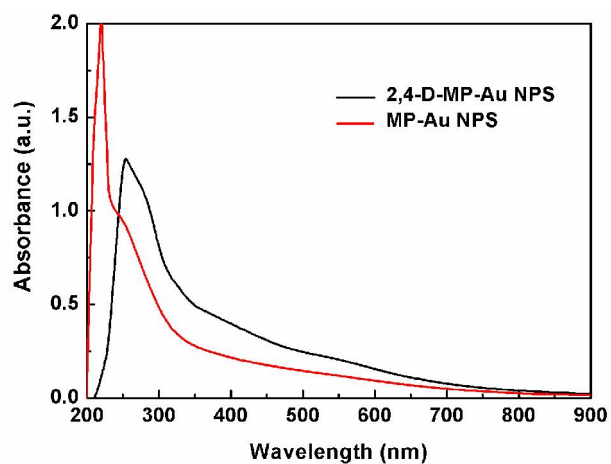

Fig. S1 UV-vis spectra of MP-Au NPs and 2,4-D-MP-Au NPs collected from chloroform solutions

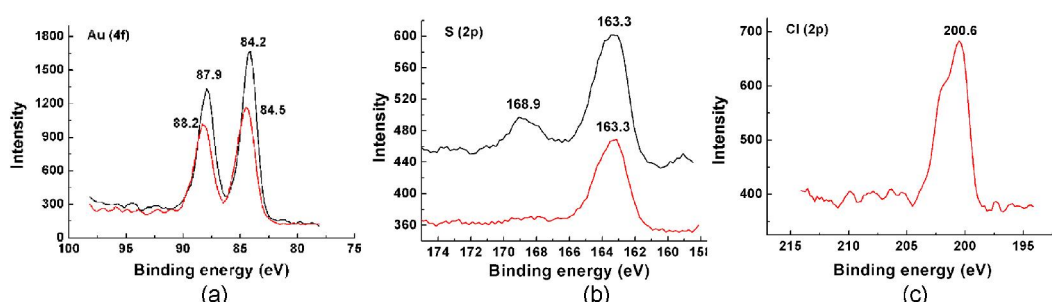

Fig. S2 XPS spectra of the Au 4f (a), S 2p (b) and Cl 2p (c) of MP-Au NPs (black curve) and 2,4-D-MP-Au NPs (red curve).
